# Supplementary material for: Addressing the energy sustainability of biowaste-derived hard carbon materials for battery electrodes
Source: Royal Society of Chemistry journal article supplement (doi:10.1039/c8gc00085a), 2018-01-01
Supplement: c8gc00085a1.pdf [file c8gc00085a1.pdf]

## SUPPLEMENTARY INFORMATION

### Addressing the energy sustainability of biowaste-derived hard carbon materials for battery electrodes

Arianna Baldinelli<sup>1</sup>, Xinwei Dou<sup>2,3</sup>, Daniel Buchholz<sup>2,3</sup>, Mario Marinaro<sup>4</sup>, Stefano Passerini<sup>2,3,\*</sup>, and Linda Barelli<sup>1,\*</sup>

1- Department of Engineering – Università degli Studi di Perugia, via G. Duranti 93, 06125, Perugia, Italy

2- Helmholtz Institute Ulm (HIU), Helmholtzstraße 11, 89081, Ulm, Germany

3- Karlsruhe Institute of Technology (KIT), P.O. Box 3640, 76021, Karlsruhe, Germany

4- ZSW, Zentrum für Sonnenenergie- und Wasserstoff-Forschung Baden-Württemberg, Helmholtzstr. 8, D-89081, Ulm, Germany

Corresponding authors: [linda.barelli@unipg.it](mailto:linda.barelli@unipg.it); [stefano.passerini@kit.edu](mailto:stefano.passerini@kit.edu)

#### SI 1 – Electrode cycling results

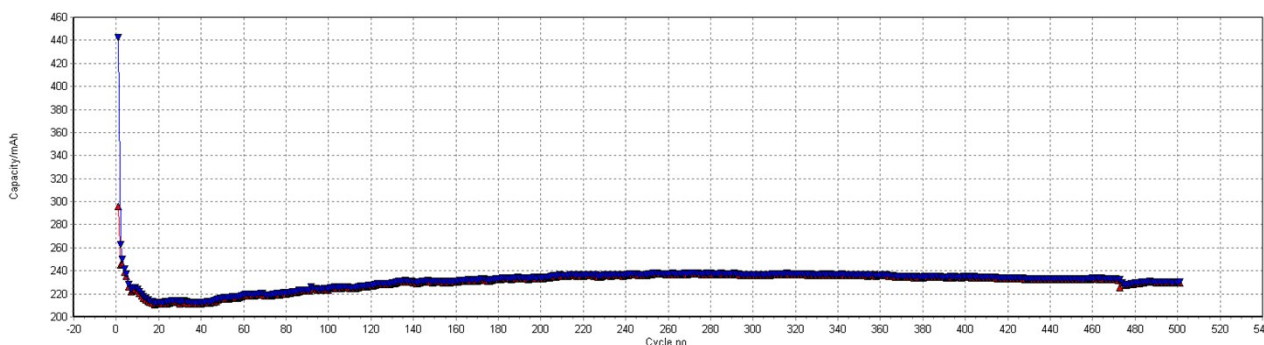

Figure SI-1. Long-term cycling performance of an apple pomace-derived hard carbon electrode in the Na//Hard carbon cell. Electrolyte: 1M NaClO<sub>4</sub> in EC: PC (1:1 wt.%). Charge and discharge current density: 200 mA h g<sup>-1</sup>. For further details, please, see reference X. Dou, D. Buchholz, S. Passerini in *APL Materials* **6** (2018) 047501.

#### SI 2 - Extended model

Hereinafter detailed modelling equations are shown. In the main manuscript a condensed version of the equations is provided, in order to introduce theoretical elements which are accounted for. Yet, the main manuscript do not go to computational details. Moreover, a complete list of symbols adopted in the equations is attached to the Supplementary Information for the sake of clarity.

$$\sum_{j=1}^3 x_j = x_{cell} + x_{hemi} + x_{lign} = 1 \quad \text{Eq. SI - 1}$$

$$w_{subs}(T) = \sum_{j=1}^3 x_j w_j(T) = x_{cell} w_{cell}(T) + x_{hemi} w_{hemi}(T) + x_{lign} w_{lign}(T) \quad \text{Eq. SI - 2}$$

$$h_{subs}(T) = \sum_{j=1}^3 x_j w_j(T) h_j(T) = x_{cell} w_{cell}(T) h_{cell}(T) + x_{hemi} w_{hemi}(T) h_{hemi}(T) + x_{lign} w_{lign}(T) h_{lign}(T) \quad \text{Eq. SI - 3}$$

$$\dot{n}_{vi,subs}(T) = \sum_{j=1}^3 x_j \dot{n}_{vi,j}(T) = x_{cell} \dot{n}_{vi,cell}(T) + x_{hemi} \dot{n}_{vi,hemi}(T) + x_{lign} \dot{n}_{vi,lign}(T) \quad \text{Eq. SI - 4}$$

$$\dot{m}_{i,subs}(T) = \frac{\dot{n}_{vi,subs}(T) PM_i}{V_{m,std}} \quad \text{Eq. SI - 5}$$

$$h_{subs}|_{A-B} = \int_{T_a}^{T_h} h_{subs}(T) dt = \int_{T_a}^{T_h} h_{subs}(T) \frac{dT}{TR} \quad \text{Eq. SI - 6}$$

$$H_{subs}|_{A-B} = m_{subs} h_{subs}|_{A-B} \quad \text{Eq. SI - 7}$$

$$h_{comb}|_{K-J} = \int_{T_k}^{T_j} \sum_{i=1}^l \dot{m}_i(T) LHV_i dt = \int_{T_k}^{T_j} \sum_{i=1}^l \dot{m}_i(T) LHV_i \frac{dT}{TR'} \quad \text{Eq. SI - 8}$$

$$(m_{hc} + m_{lbs} + m_{tar}) + m_{pyrogas} = (m_{hc} + m_{lbs} + m_{tar}) + \sum_{i=1}^l \int_{RT}^{T_{fin}} \dot{m}_i(T) \frac{dT}{TR'} = 1 \quad \text{Eq. SI - 9}$$

$$h_{subs}|_{K-J} = \varphi \Delta H_{wat,(RT-T_{ev})} + (1 - \varphi) \Delta H_{subs,(RT-T_{pyr})} \quad \text{Eq. SI - 10}$$

$$\Delta H_{wat,(RT-T_{ev})} = \bar{c}_{wat}^-(T_{ev} - RT) + \Delta H_{ev,wat}(T_{ev}) \quad \text{Eq. SI - 10a}$$

$$\Delta H_{subs,(RT-T_{pyr})} = \bar{c}_{p,subs}^-(T_{pyr} - RT) + \int_{T_{pyr}}^{T_{fin}} h_{subs}(T) \frac{dT}{TR} \quad \text{Eq. SI - 10b}$$

$\eta_{pyr}$

$$\eta_{pyr} = \frac{m_{pyrogas} LHV_{pyrogas} + m_{tars}^{\sim} LHV_{tars} + m_{hc} LH}{m_{subs} \left[ \left( \sum_{j=1}^3 x_j LHV_j \right) + |DH_{pyr}| \right]} \quad \text{Eq. SI - 11}$$



## List of Symbols and abbreviations

### *Symbols*

|             |                         |                                                                  |
|-------------|-------------------------|------------------------------------------------------------------|
| $\dot{h}$   | [W g <sup>-1</sup> ]    | reaction specific heat release/uptake rate                       |
| $h$         | [J g <sup>-1</sup> ]    | reaction specific heat release/uptake                            |
| $i$         | -                       | fibres components index (from 1 to 3)                            |
| $j$         | -                       | volatile gases components index (from 1 to 6)                    |
| $H$         | [J]                     | reaction total heat release/uptake                               |
| LHV         | [MJ kg <sup>-1</sup> ]  | Low Heating Value                                                |
| $\dot{m}$   | [g min <sup>-1</sup> ]  | mass flow rate (absolute or specific to substrate initial mass)  |
| $m$         | [g],[kg]                | mass (absolute or specific to substrate initial mass)            |
| $\dot{n}_v$ | [ml min <sup>-1</sup> ] | volume flowrate (absolute or specific to substrate initial mass) |
| PM          | [g mol <sup>-1</sup> ]  | molecular weight                                                 |
| $t$         | [s], [min]              | time                                                             |
| $T$         | [°C]                    | temperature                                                      |
| TR          | [°C min <sup>-1</sup> ] | temperature rate                                                 |
| $V_m$       | [l mol <sup>-1</sup> ]  | molar volume                                                     |
| $w$         | [%]                     | residual mass (as a fraction of the original specimen mass)      |
| $x$         | [%]                     | mass fraction                                                    |

### *Subscripts*

|      |                                          |
|------|------------------------------------------|
| as   | as received                              |
| cell | cellulose                                |
| comb | combustion                               |
| hemi | hemicellulose                            |
| lbs  | low boiling substances (including water) |
| lign | lignin                                   |
| std  | standard                                 |
| subs | substrate                                |
| wat  | water                                    |
